# Supplementary material for: Molecular and genetic dissection of recursive splicing
Source: Life Sci Alliance. 2021 Nov 10;5(1):e202101063. doi: 10.26508/lsa.202101063 (PMC8605326; doi:10.26508/lsa.202101063)
Supplement: Supplementary file 2 [file LSA-2021-01063_TableS2.xlsx]

## Sheet: recursive splicing primers
Supplementary Table 2. Oligonucleotide sequences used in this study.
These constructs switch Ubx0nt RS-exon with Ubxm1,m2 and chinmo RS-exons
spe_Ubx_0-m1F	TACGGCGGCATATCAACAGACATGGGTGAGTAAATAAGTATAATAATAAAAAG
spe_Ubx_0-m1R	TTGTGTTAAATCAGATCTTATCTTACCTAGAAAAGAGAAGAAAATAGTTTG
spe_Ubx_0-m2F	GGCTCACTTCTACCAGACTGGCTAGGTGAGTAAATAAGTATAATAATAAAAAG
spe_Ubx_0-m2R	CGCAAGAGATTCTGAGTATCTCTTACCTAGAAAAGAGAAGAAAATAGTTTG
spe_Ubx0-chinmoF	ATTAGGCCGTTGTGGTGTATAGCGTAACGTGAGTAAATAAGTATAATAATAAAAAG
spe_Ubx0-chinmoR	TAGTTCGAAAAAAGGCACCAGTGCTTACCTAGAAAAGAGAAGAAAATAGTTTG
These constructs switch Ubxm1 RS-exon with Ubx0nt,m2 and chinmo RS-exons
spe_Ubxm1-0ntF	TAAACCAAAACAAAAACATTGACAAAGTAAGAAAATTTCCACTTTTATTTC
spe_Ubxm1-0ntR	AGGGTGTATTAAATATTTGACACTTACCTGAAAATGCAAGCAAAG
spe_Ubxm1-m2F	GGCTCACTTCTACCAGACTGGCTAGGTAAGAAAATTTCCACTTTTATTTC
spe_Ubxm1-m2R	CGCAAGAGATTCTGAGTATCTCTTACCTGAAAATGCAAGCAAAG
spe_Ubxm1-chinmoF	ATTAGGCCGTTGTGGTGTATAGCGTAACGTAAGAAAATTTCCACTTTTATTTC
spe_Ubxm1-chinmoR	TAGTTCGAAAAAAGGCACCAGTGCTTACCTGAAAATGCAAGCAAAG
Ubxm1_AA_Gdep_F	tactataaaatatcaacagacatggGTAAGAAAATTTCCACTTTTATTTC
Ubxm1_AA_Gdep_R	ttgggaatttattggttttatcttacCTGAAAATGCAAGCAAAG
Ubx0nt_FramePres_F	taaaccaaaaccaaaaacatcgacaaaGTGAGTAAATAAGTATAATAATAAAAAG
Ubx0nt_FramePres_R	agggtgtattaaatatttgacacttacCTAGAAAAGAGAAGAAAATAGTTTG
These constructs scramble the left and right segments of the Ubxm1 RS-exon
left_m1_scramble_F	tacggcggcatatcaacagacatggGTAAGAAAATTTCCACTTTTATTTC
left_m1_scramble_R	catatagtgttcctcatgtatcttacCTGAAAATGCAAGCAAAG
right_m1_scramble_F	atactacaagtcagatacactatggGTAAGAAAATTTCCACTTTTATTTC
right_m1_scramble_R	ttgtgttaaatcagatcttatcttacCTGAAAATGCAAGCAAAG
These constructs scramble the left and right segments of the Ubxm2 RS-exon in the Ubx0nt splicing backbone
left_m2_scramble_F	agctcacttctaccagactggctagGTGAGTAAATAAGTATAATAATAAAAAG
left_m2_scramble_R	gttatagccatgcaatagactcttacCTAGAAAAGAGAAGAAAATAGTTTG
right_m2_scramble_F	gtcggtaatactattccggtcctagGTGAGTAAATAAGTATAATAATAAAAAG
right_m2_scramble_R	cgcaagagattctgagtatctcttacCTAGAAAAGAGAAGAAAATAGTTTG
primers to remove intron segment 1
Ubx0nt_del_Upint_F	gGTAAGTGTCAAATATTTAATACAC
Ubxm1_del_Upint_F	gGTAAGATAAGATCTGATTTAACAC
smRI_del_Upint_F	gGTAAGTCGCTGTTTTCTATAC
msiRI_del_Upint_F	gGTCAGTATCGGAGATGAAC
heph245_del_Upint_F	gGTAAGTTTGCACTACGAG
Cloning ~3kb RP sequence into kuz minigene
chinmo_f	CTTGCTGTCTCCCTTTCTCC
chinmo_r	ACAAGCAAGCAGACACAAGC
cut_f	GAAAACAACAAGGGTCAACTGATG
cut_r	TAAAAGTGAGCCACAGAAGCG
fra_f	GCCAGATACTGTTGTCCAC
fra_r	TTTATGGTTTCTGCAGCGAC
hth_f	CCACAACGCAGTTGCTCC
hth_r	CAAACGACGAGCGACAGC
nmo_f	TTGACGCAAGGTGGAGTTTG
nmo_r	TTGTTGCTCAAGATCACACAC
shep_f	AACTGCAGCGACAACAGC
shep_r	GAACCACATATAGGACCACG
sm_f	GATTTCGTCAACTGCTCATACC
sm_r	GTAAGGTTTGTGCGTGGAG
Ubx0nt_f	CAACGATGGCAGTTCAGC
Ubx0nt_r	CTGCATGTAGCAGGGATC
UbxmI_f	TGACTTCTTCTGGCTGCAAC
UbxmI_r	GGTGCTTATCTGTGAGAGTC
heph245_f	AAGCTCAGTGCGAAAGCTCC
heph245_r	GTCATCATGAACCGTCAGTC
heph349_f	TTCGTGCTTTGGCAGGATGG
heph349_r	CTCTCCGAACTTCCAAGACG
msi87_f	TGGCACGTGCATCTCGTCAC
msi87_r	GCATTCCTCAACTGAGCTAC
mub29_f	CTTTCTCGGACTCTCGATCC
mub29_r	GAAAGTTGCAACTGCACCTC
ps67_f	AGCTGCTGCACAGTGTCAAC
ps67_r	CATGTGATACGTTGTCTCGC
egfr_f	ATCGAGCAGGCTTGTTGTC
egfr_r	ATAACTCACCACTAGCTTAGCG
RP 5'SS disruption
mut_heph245RP_f	CTGCTTTCAGaaAAGTTTGCACTAC
mut_heph245RP_r	AAGAGAGAAACGAAACGTTAAATTTC
mut_mubRP_f	CTCGTTTCAGaaACGTGTCCATG
mut_mubRP_r	AGAAAACAGTGAATTTAATGAAC
mut_ctRP_f	TCTTTTACAGaaATGTTTACATCGAAG
mut_ctRP_r	AGAAGACATGTGTCAATTAG
mut_Ubx0ntRP_f	TCTTTTCTAGaaAAGTGTCAAATATTTAATAC
mut_Ubx0ntRP_r	GAAGAAAATAGTTTGATTAGTATTAG
RS-exon rt-PCR for endogenous loci and reporter constructs
for constructs cloned into the kuz minigene
splicing reporter
kuz.mg.fwd1	TACTAGTCCAGTGTGGTGG
kuzexon4rvs	CGCTCTATTGTGACTAGCTCGGATG
endogenous mRNA
kuzexon2-new.fwd	CGACAGCCATCCACGTTGGATC
kuzexon4rvs	CGCTCTATTGTGACTAGCTCGGATG
endogenous recursive intermediate 1
kuzexon2-new.fwd	CGACAGCCATCCACGTTGGATC
kuzRI1rvs	ATGGAACCAGTCATCCTCGTCC
endogenous recursive intermediate 2
kuzexon2-new.fwd	CGACAGCCATCCACGTTGGATC
kuzRI2rvs	TCCAGCTCGATTAAGATGTCTTCC
Beadex (Bx)
endogenous mRNA
bxdistE1fwd	CGAACCGACCGCAAAAGC
bxE2rvs	AGTTGACCACATTGACCACG
endogenous recursive intermediate
bxdistE1fwd	CGAACCGACCGCAAAAGC
bxRIrvs	CTAATTGTTGTTGTGCTGCCG
